# Supplementary material for: Copulation Duration and Sperm Precedence with Reference to Larval Diapause Induction in Monochamus alternatus Hope (Coleoptera: Cerambycidae)
Source: MDPI journal article supplement (doi:10.3390/insects15040255), 2024-04-08
Supplement: s1 [file s1]

**Table S1.** Rearing conditions and food of *Monochamus alternatus alternatus* and *M. a. endai* populations used in Experiments 1–3.

| Experiment                                         | 1                           | 2 and 3                                              |                                                      |
|----------------------------------------------------|-----------------------------|------------------------------------------------------|------------------------------------------------------|
| Insect                                             | <i>M. a. endai</i>          | <i>M. a. alternatus</i>                              | <i>M. a. endai</i>                                   |
| Rearing conditions of immature stages <sup>1</sup> | 25°C, LD 12:12 h            | 25°C, LD 16:8 h                                      | 25°C, LD 16:8 h                                      |
| Larval food <sup>2</sup>                           | <i>P. densiflora</i> bolts  | <i>P. densiflora</i> and <i>P. thunbergii</i> bolts  | <i>P. densiflora</i> bolts                           |
| Conditions to terminate diapause <sup>1</sup>      | 10°C, LD 12:12 h            | N/A                                                  | 10 °C, LD 8:16 h                                     |
| Term to terminate diapause                         | 5 months or longer          | N/A                                                  | 9.6 months                                           |
| Rearing conditions of adults <sup>1</sup>          | 25°C, LD 12:12 h            | 25°C, LD 16:8 h                                      | 25°C, LD 16:8 h                                      |
| Adult food <sup>2</sup>                            | <i>P. densiflora</i> twig   | <i>P. densiflora</i> and <i>P. thunbergii</i> twig   | <i>P. densiflora</i> and <i>P. thunbergii</i> twig   |
| Oviposition substrate <sup>2</sup>                 | <i>P. densiflora</i> branch | <i>P. densiflora</i> and <i>P. thunbergii</i> branch | <i>P. densiflora</i> and <i>P. thunbergii</i> branch |

<sup>1</sup> For example, LD 12:12 h represents a 12-h light/dark photoperiod.

<sup>2</sup> *P. densiflora* and *P. thunbergii* are *Pinus densiflora* and *Pinus thunbergii* , respectively.
