# Supplementary material for: Copulation Duration and Sperm Precedence with Reference to Larval Diapause Induction in Monochamus alternatus Hope (Coleoptera: Cerambycidae)
Source: MDPI journal article supplement (doi:10.3390/insects15040255), 2024-04-08
Supplement: s1 [file s1]

**Table S2.** Dimensions of *Pinus densiflora* bolts used to rear offspring of *Monochamus alternatus alternatus* (T) and *M. a. endai* (J) female adults that had experienced different types of mating in Experiments 2 and 3 in order to assess the second male sperm precedence ( $P_2$  value).

| Experiment | Type of mating (female × male)                | Pine bolts used to rear offspring |             |               |                                      |
|------------|-----------------------------------------------|-----------------------------------|-------------|---------------|--------------------------------------|
|            |                                               | Number                            | Length (cm) | Diameter (cm) | Bark surface area (cm <sup>2</sup> ) |
| 2          | T × T                                         | 40                                | 15.0 ± 0.1  | 5.90 ± 0.22   | 277.6 ± 10.5                         |
|            | T × J after mating with a T male <sup>1</sup> | 40                                | 15.0 ± 0.1  | 5.87 ± 0.23   | 277.1 ± 10.8                         |
|            | T × J after mating with a T male <sup>2</sup> | 37                                | 15.0 ± 0.1  | 5.48 ± 0.22   | 258.5 ± 10.8                         |
|            | T × J                                         | 36                                | 15.1 ± 0.1  | 5.90 ± 0.25   | 279.6 ± 12.0                         |
|            | J × J                                         | 36                                | 15.0 ± 0.1  | 5.89 ± 0.24   | 277.7 ± 11.2                         |
|            | Total                                         | 189                               | 15.0 ± 0.0  | 5.81 ± 0.10   | 274.2 ± 4.9                          |
|            | Bartlett's test                               |                                   |             |               |                                      |
|            | $\chi^2$ value (df =4)                        |                                   | 3.02        | 0.41          | 0.41                                 |
|            | <i>p</i> value                                |                                   | 0.554       | 0.982         | 0.982                                |
|            | One-way ANOVA                                 |                                   |             |               |                                      |
|            | <i>F</i> value (df = 4, 184)                  |                                   | 0.27        | 0.62          | 0.62                                 |
|            | <i>p</i> value                                |                                   | 0.896       | 0.649         | 0.649                                |
| 3          | T × T                                         | 31                                | 15.0 ± 0.1  | 4.94 ± 0.47   | 231.9 ± 22.1                         |
|            | T × J after mating with a T male <sup>1</sup> | 31                                | 14.9 ± 0.1  | 4.94 ± 0.47   | 230.1 ± 21.7                         |
|            | T × J                                         | 31                                | 15.0 ± 0.1  | 4.89 ± 0.46   | 231.3 ± 22.0                         |
|            | J × J                                         | 31                                | 15.0 ± 0.1  | 4.79 ± 0.43   | 224.4 ± 20.0                         |
|            | Total                                         | 124                               | 15.0 ± 0.0  | 4.89 ± 0.23   | 229.4 ± 10.7                         |

|                              |  |       |       |       |
|------------------------------|--|-------|-------|-------|
| <b>Bartlett's test</b>       |  |       |       |       |
| $\chi^2$ value (df =3)       |  | 3.62  | 0.36  | 0.36  |
| <i>p</i> value               |  | 0.306 | 0.948 | 0.948 |
| <b>One-way ANOVA</b>         |  |       |       |       |
| <i>F</i> value (df = 3, 120) |  | 0.96  | 0.02  | 0.03  |
| <i>p</i> value               |  | 0.416 | 0.996 | 0.995 |

---

<sup>1</sup> Pine bolts were used to rear offspring produced by T females 1–7 or 1–8 days after remating with a J male.

<sup>2</sup> Pine bolts were used to rear offspring produced by T females 20–37 days after remating with a J male.
